# Supplementary material for: Development and validation of mPCR-CEFA for detecting multiple deletion and non-deletion thalassemia genotypes
Source: Front Genet. 2025 Jul 8;16:1564565. doi: 10.3389/fgene.2025.1564565 (PMC12282245; doi:10.3389/fgene.2025.1564565)
Supplement: Supplementary file 1 [file Table1.xlsx]

## Sheet:  Supplementary Table S1
	Supplementary Table S1. α- and β-Globin Gene Variants and Corresponding HGVS Names.
	Variants	HGVS Name
	-α3.7	NG_000006.1:g.34247_38050del
	-α4.2	NC_000016.10:g.169818_174075del
	αααanti3.7	NG_000006.1:g.34247_38050dup
	αααanti4.2	NG_000006.1:g.(31957_31978)_(34525_34544)dup
	--SEA	NC_000016.10:g.165401_184701del
	--THAI	NC_000016.10:g.149863_183312del
	-α2.4	NG_000006.1:g.36859_39252del
	-α21.9	NG_000006.1:g.[14373_36299del21927; insGGGAAGGGTGGGTGGGAATAACAGCTTTT]
	-α27.6	NG_000006.1:g.9079_36718del27640
	Gγ+ (Aγδβ)0	NC_000011.10:g.5169918_5248821del
	SEA-HPFH	NC_000011.10:g.5201647_5229059del
	Taiwanese	NG_000007.3:g.69997_71353del1357
	αCSα	HBA2:c.427T>C
	αQSα	HBA2:c.377T>C
	αWSα	HBA2:c.369C>G
	αCD 30α	HBA2:c.91_93delGAG
	αCD 74α	HBA1:c.223G>C
	β-90	HBB:c.-140C>T
	β-50	HBB:c.-100G>A
	β-29	HBB:c.-79A>G
	β-28	HBB:c.-78A>G
	βCap+40-43	HBB:c.-10_-7delAACA
	βInit CD	HBB:c.2T>G
	βCD 5	HBB:c.17_18delCT
	βCD 14/15	HBB:c.45dupG
	βCD 17	HBB:c.52A>T
	βCD 26	HBB:c.79G>A
	βCD 27/28	HBB:c.85dupC
	βIVS-I-1	HBB:c.92+1G>T/HBB:c.92+1G>A
	βIVS-I-5	HBB:c.92+5G>C
	βCD 37	HBB:c.113G>A
	βCD 41/42	HBB:c.126_129delCTTT
	βCD 43	HBB:c.130G>T/HBB:c.130G>A
	βCD 54-58	HBB:c.165_177delTATGGGCAACCCT
	βCD 71/72	HBB:c.217dupA
	βCD 95	HBB:c.287dupA
	βIVS-II-5	HBB:c.315+5G>C
	βIVS-II-654	HBB:c.316-197C>T
	HKαα	N/A
	fusion	N/A

## Sheet:  Supplementary Table S2
	Supplementary Table S2. Primer Design and Amplicon Characteristics for mPCR-CEFA.
	Target		Fluorescence Label	Amplicon Size (bp)
	Ratio Calculation	α1(WS)	NED	242
		α2(WS)	NED	247
		α1(QS)	NED	228
		α2(QS)	NED	233
		α1(CS)	NED	182
		α2(CS)	NED	187
		Y1	VIC	91
		Y2	VIC	94
	α-Chain Deletions	--SEA	VIC	137
		--THAI	VIC	163
		-α21.9	VIC	176
		-α27.6	VIC	148
		-α2.4	VIC	295
	α-Chain Non-Deletions	αWSα	VIC	251
		αQSα	VIC	236
		αCSα	VIC	194
		αCD 30α	VIC	515
		αCD 74α	VIC	271
		fusion	VIC	505
	β-Chain Deletions	SEA-HPFH	FAM	380
		Gγ+ (Aγδβ)0	FAM	194
		Taiwanese	FAM	390
	β-Chain Non-Deletions	-50M	FAM	132
		-28M	FAM	163
		CD 17M	FAM	289
		CD 26M	FAM	309
		CD 27/28M	FAM	317
		CD 41/42M	FAM	362
		CD 43M G>T	FAM	346
		CD 43M G>A	FAM	349
		CD 71/72M	FAM	261
		IVS I-1M G>T	FAM	327
		IVS I-1M G>A	FAM	329
		IVS II-654M	FAM	407
		-90M	FAM	99
		-29M	FAM	153
		CD 5M	FAM	249
		CD 14/15M	FAM	276
		CD 37M	FAM	476
		CD 54-58M	FAM	296
		CD 95M	FAM	187
		IVS I-5M	FAM	336
		IVS II-5M	FAM	172
		CAPM	FAM	221
		InitM	FAM	233
		-50N	NED	135
		-28N	NED	155
		CD 17N	NED	284
		CD 26N	NED	312
		CD 27/28N	NED	320
		CD 41/42-43N	NED	354
		CD 71/72N	NED	264
		IVS I-1N	NED	332
		IVS II-654N	NED	427
	Internal Control	GAPDH	FAM	82
		AMELX	VIC	106
		AMELY	VIC	112

## Sheet:  Supplementary Table S3
	Supplementary Table S3. Results of mPCR-CEFA for 200 Clinical Samples
	Sample ID	Genotype	mPCR-CEFA	Result Interpretation	Notes
	1	αα/αα	αα/αα	Concordant	-
	2	αα/αα	αα/αα	Concordant	-
	3	αα/αα	αα/αα	Concordant	-
	4	αα/αα	αα/αα	Concordant	-
	5	αα/αα	αα/αα	Concordant	-
	6	αα/αα	αα/αα	Concordant	-
	7	αα/αα	αα/αα	Concordant	-
	8	αα/αα	αα/αα	Concordant	-
	9	αα/αα	αα/αα	Concordant	-
	10	αα/αα	αα/αα	Concordant	-
	11	αα/αα	αα/αα	Concordant	-
	12	αα/αα	αα/αα	Concordant	-
	13	αα/αα	αα/αα	Concordant	-
	14	αα/αα	αα/αα	Concordant	-
	15	αα/αα	αα/αα	Concordant	-
	16	-α3.7/αα	-α3.7/αα	Concordant	-
	17	-α3.7/αα	-α3.7/αα	Concordant	-
	18	-α3.7/αα	-α3.7/αα	Concordant	-
	19	-α3.7/αα	-α3.7/αα	Concordant	-
	20	-α3.7/αα	-α3.7/αα	Concordant	-
	21	-α3.7/αα	-α3.7/αα	Concordant	-
	22	-α3.7/αα	-α3.7/αα	Concordant	-
	23	-α3.7/αα	-α3.7/αα	Concordant	-
	24	-α3.7/αα	-α3.7/αα	Concordant	-
	25	-α3.7/αα	-α3.7/αα	Concordant	-
	26	-α3.7/αα	-α3.7/αα	Concordant	-
	27	-α3.7/αα	-α3.7/αα	Concordant	-
	28	-α3.7/αα	-α3.7/αα	Concordant	-
	29	-α3.7/αα	-α3.7/αα	Concordant	-
	30	-α3.7/αα	-α3.7/αα	Concordant	-
	31	-α3.7/αα	-α3.7/αα	Concordant	-
	32	-α3.7/αα	-α3.7/αα	Concordant	-
	33	-α3.7/αα	-α3.7/αα	Concordant	-
	34	-α3.7/αα	-α3.7/αα	Concordant	-
	35	-α3.7/αα	-α3.7/αα	Concordant	-
	36	-α3.7/αα	-α3.7/αα	Concordant	-
	37	-α3.7/αα	-α3.7/αα	Concordant	-
	38	-α3.7/αα	-α3.7/αα	Concordant	-
	39	-α3.7/αα	-α3.7/αα	Concordant	-
	40	-α4.2/αα	-α4.2/αα	Concordant	-
	41	-α4.2/αα	-α4.2/αα	Concordant	-
	42	-α4.2/αα	-α4.2/αα	Concordant	-
	43	-α4.2/αα	-α4.2/αα	Concordant	-
	44	-α4.2/αα	-α4.2/αα	Concordant	-
	45	-α4.2/αα	-α4.2/αα	Concordant	-
	46	-α4.2/αα	-α4.2/αα	Concordant	-
	47	-α4.2/αα	-α4.2/αα	Concordant	-
	48	-α4.2/αα	-α4.2/αα	Concordant	-
	49	-α4.2/αα	-α4.2/αα	Concordant	-
	50	-α4.2/αα	-α4.2/αα	Concordant	-
	51	-α4.2/αα	-α4.2/αα	Concordant	-
	52	-α4.2/αα	-α4.2/αα	Concordant	-
	53	-α4.2/αα	-α4.2/αα	Concordant	-
	54	-α4.2/αα	-α4.2/αα	Concordant	-
	55	-α4.2/αα	-α4.2/αα	Concordant	-
	56	-α4.2/αα	-α4.2/αα	Concordant	-
	57	-α4.2/αα	-α4.2/αα	Concordant	-
	58	-α4.2/αα	-α4.2/αα	Concordant	-
	59	-α4.2/αα	-α4.2/αα	Concordant	-
	60	--SEA/αα	--SEA/αα	Concordant	-
	61	--SEA/αα	--SEA/αα	Concordant	-
	62	--SEA/αα	--SEA/αα	Concordant	-
	63	--SEA/αα	--SEA/αα	Concordant	-
	64	--SEA/αα	--SEA/αα	Concordant	-
	65	--SEA/αα	--SEA/αα	Concordant	-
	66	--SEA/αα	--SEA/αα	Concordant	-
	67	--SEA/αα	--SEA/αα	Concordant	-
	68	--SEA/αα	--SEA/αα	Concordant	-
	69	--SEA/αα	--SEA/αα	Concordant	-
	70	--SEA/αα	--SEA/αα	Concordant	-
	71	--SEA/αα	--SEA/αα	Concordant	-
	72	--SEA/αα	--SEA/αα	Concordant	-
	73	--SEA/αα	--SEA/αα	Concordant	-
	74	--SEA/αα	--SEA/αα	Concordant	-
	75	--SEA/αα	--SEA/αα	Concordant	-
	76	--SEA/αα	--SEA/αα	Concordant	-
	77	--SEA/αα	--SEA/αα	Concordant	-
	78	--SEA/αα	--SEA/αα	Concordant	-
	79	--SEA/αα	--SEA/αα	Concordant	-
	80	--SEA/αα	--SEA/αα	Concordant	-
	81	--SEA/αα	--SEA/αα	Concordant	-
	82	--SEA/αα	--SEA/αα	Concordant	-
	83	--THAI/αα	--THAI/αα	Concordant	-
	84	--THAI/αα	--THAI/αα	Concordant	-
	85	--THAI/αα	--THAI/αα	Concordant	-
	86	--THAI/αα	--THAI/αα	Concordant	-
	87	--THAI/αα	--THAI/αα	Concordant	-
	88	-α27.6/--SEA	-α27.6/--SEA	Concordant	-
	89	-α27.6/--SEA	-α27.6/--SEA	Concordant	-
	90	-α27.6/--SEA	-α27.6/--SEA	Concordant	-
	91	αCSα/αα	αCSα/αα	Concordant	-
	92	αCSα/αα	αCSα/αα	Concordant	-
	93	αCSα/αα	αCSα/αα	Concordant	-
	94	αCSα/αα	αCSα/αα	Concordant	-
	95	αCSα/αα	αCSα/αα	Concordant	-
	96	αQSα/αα	αQSα/αα	Concordant	-
	97	αQSα/αα	αQSα/αα	Concordant	-
	98	αQSα/αα	αQSα/αα	Concordant	-
	99	αQSα/αα	αQSα/αα	Concordant	-
	100	αQSα/αα	αQSα/αα	Concordant	-
	101	αWSα/αα	αWSα/αα	Concordant	-
	102	αWSα/αα	αWSα/αα	Concordant	-
	103	αWSα/αα	αWSα/αα	Concordant	-
	104	αWSα/αα	αWSα/αα	Concordant	-
	105	αWSα/αα	αWSα/αα	Concordant	-
	106	Gγ+ (Aγδβ)0	Gγ+ (Aγδβ)0	Concordant	-
	107	Gγ+ (Aγδβ)0	Gγ+ (Aγδβ)0	Concordant	-
	108	Gγ+ (Aγδβ)0	Gγ+ (Aγδβ)0	Concordant	-
	109	SEA-HPFH	SEA-HPFH	Concordant	-
	110	SEA-HPFH	SEA-HPFH	Concordant	-
	111	SEA-HPFH	SEA-HPFH	Concordant	-
	112	β-29/βN	β-29/βN (or β-29/β-29)	Concordant	Do not distinguish between heterozygous and homozygous
	113	β-29/βN	β-29/βN (or β-29/β-29)	Concordant	Do not distinguish between heterozygous and homozygous
	114	β-29/βN	β-29/βN (or β-29/β-29)	Concordant	Do not distinguish between heterozygous and homozygous
	115	β-29/βN	β-29/βN (or β-29/β-29)	Concordant	Do not distinguish between heterozygous and homozygous
	116	β-28/βN	β-28/βN	Concordant	-
	117	β-28/βN	β-28/βN	Concordant	-
	118	β-28/βN	β-28/βN	Concordant	-
	119	βCap+40−43/βN	βCap+40−43/βN (or βCap+40−43/βCap+40−43)	Concordant	Do not distinguish between heterozygous and homozygous
	120	βCap+40−43/βN	βCap+40−43/βN (or βCap+40−43/βCap+40−43)	Concordant	Do not distinguish between heterozygous and homozygous
	121	βCap+40−43/βN	βCap+40−43/βN (or βCap+40−43/βCap+40−43)	Concordant	Do not distinguish between heterozygous and homozygous
	122	βInit CD/βN	βInit CD/βN (or βInit CD/βInit CD)	Concordant	Do not distinguish between heterozygous and homozygous
	123	βInit CD/βN	βInit CD/βN (or βInit CD/βInit CD)	Concordant	Do not distinguish between heterozygous and homozygous
	124	βInit CD/βN	βInit CD/βN (or βInit CD/βInit CD)	Concordant	Do not distinguish between heterozygous and homozygous
	125	βInit CD/βN	βInit CD/βN (or βInit CD/βInit CD)	Concordant	Do not distinguish between heterozygous and homozygous
	126	βCD 14/15/βN	βCD 14/15/βN (or βCD 14/15/βCD 14/15)	Concordant	Do not distinguish between heterozygous and homozygous
	127	βCD 14/15/βN	βCD 14/15/βN (or βCD 14/15/βCD 14/15)	Concordant	Do not distinguish between heterozygous and homozygous
	128	βCD 17/βN	βCD 17/βN	Concordant	-
	129	βCD 17/βN	βCD 17/βN	Concordant	-
	130	βCD 17/βN	βCD 17/βN	Concordant	-
	131	βCD 26/βN	βCD 26/βN	Concordant	-
	132	βCD 26/βN	βCD 26/βN	Concordant	-
	133	βCD 26/βN	βCD 26/βN	Concordant	-
	134	βCD 26/βN	βCD 26/βN	Concordant	-
	135	βCD 27/28/βN	βCD 27/28/βN	Concordant	-
	136	βCD 27/28/βN	βCD 27/28/βN	Concordant	-
	137	βCD 27/28/βN	βCD 27/28/βN	Concordant	-
	138	βCD 27/28/βN	βCD 27/28/βN	Concordant	-
	139	βIVS I-1/βN	βIVS I-1/βN	Concordant	-
	140	βIVS I-1/βN	βIVS I-1/βN	Concordant	-
	141	βIVS I-1/βN	βIVS I-1/βN	Concordant	-
	142	βIVS I-5/βN	βIVS I-5/βN (or βIVS I-5/βIVS I-5)	Concordant	Do not distinguish between heterozygous and homozygous
	143	βCD 41/42/βN	βCD 41/42/βN	Concordant	-
	144	βCD 41/42/βN	βCD 41/42/βN	Concordant	-
	145	βCD 41/42/βN	βCD 41/42/βN	Concordant	-
	146	βCD 41/42/βN	βCD 41/42/βN	Concordant	-
	147	βCD 41/42/βN	βCD 41/42/βN	Concordant	-
	148	βCD 43/βN	βCD 43/βN	Concordant	-
	149	βCD 43/βN	βCD 43/βN	Concordant	-
	150	βCD 43/βN	βCD 43/βN	Concordant	-
	151	βCD 71/72/βN	βCD 71/72/βN	Concordant	-
	152	βCD 71/72/βN	βCD 71/72/βN	Concordant	-
	153	βCD 71/72/βN	βCD 71/72/βN	Concordant	-
	154	βCD 71/72/βN	βCD 71/72/βN	Concordant	-
	155	βIVS II-654/βN	βIVS II-654/βN	Concordant	-
	156	βIVS II-654/βN	βIVS II-654/βN	Concordant	-
	157	βIVS II-654/βN	βIVS II-654/βN	Concordant	-
	158	αααanti-3.7/αα	αααanti-3.7/αα	Concordant	-
	159	αααanti-3.7/αα	αααanti-3.7/αα	Concordant	-
	160	αααanti-3.7/αα	αααanti-3.7/αα	Concordant	-
	161	αααanti-3.7/αα	αααanti-3.7/αα	Concordant	-
	162	αααanti-3.7/αα	αααanti-3.7/αα	Concordant	-
	163	αααanti-4.2/αα	αααanti-4.2/αα	Concordant	-
	164	αααanti-4.2/αα	αααanti-4.2/αα	Concordant	-
	165	αααanti-4.2/αα	αααanti-4.2/αα	Concordant	-
	166	αααanti-4.2/αα	αααanti-4.2/αα	Concordant	-
	167	Hkαα/αα	Hkαα/αα	Concordant	-
	168	Hkαα/αα	Hkαα/αα	Concordant	-
	169	Hkαα/αα	Hkαα/αα	Concordant	-
	170	Hkαα/αα	Hkαα/αα	Concordant	-
	171	Hkαα/αα	Hkαα/αα	Concordant	-
	172	Hkαα/αα	Hkαα/αα	Concordant	-
	173	fusion	fusion	Concordant	-
	174	fusion	fusion	Concordant	-
	175	fusion	fusion	Concordant	-
	176	-α2.4/--SEA	-α2.4/--SEA	Concordant	-
	177	-α21.9/--SEA	-α21.9/--SEA	Concordant	-
	178	-α21.9/--SEA	-α21.9/--SEA	Concordant	-
	179	αCD 30α/αα	αCD 30α/αα (or αCD 30α/αCD 30α)	Concordant	Do not distinguish between heterozygous and homozygous
	180	αCD 30α/αα	αCD 30α/αα (or αCD 30α/αCD 30α)	Concordant	Do not distinguish between heterozygous and homozygous
	181	αCD 74α/-α4.2	αCD 74α/-α4.2	Concordant	-
	182	Twdel/βCD 17	Twdel/βCD 17	Concordant	-
	183	β-90/βN	β-90/βN (or β-90/β-90)	Concordant	Do not distinguish between heterozygous and homozygous
	184	β-90/βN	β-90/βN (or β-90/β-90)	Concordant	Do not distinguish between heterozygous and homozygous
	185	β-90/βN	β-90/βN (or β-90/β-90)	Concordant	Do not distinguish between heterozygous and homozygous
	186	β-90/βN	β-90/βN (or β-90/β-90)	Concordant	Do not distinguish between heterozygous and homozygous
	187	β-50/βN	β-50/βN	Concordant	-
	188	βCD 5/βN	βCD 5/βN (or βCD 5/βCD 5)	Concordant	Do not distinguish between heterozygous and homozygous
	189	βCD 37/βN	βCD 37/βN (or βCD 37/βCD 37)	Concordant	Do not distinguish between heterozygous and homozygous
	190	βCD 37/βN	βCD 37/βN (or βCD 37/βCD 37)	Concordant	Do not distinguish between heterozygous and homozygous
	191	βCD 37/βN	βCD 37/βN (or βCD 37/βCD 37)	Concordant	Do not distinguish between heterozygous and homozygous
	192	βCD 54-58/βN	βCD 54-58/βN (or βCD 54-58/βCD 54-58)	Concordant	Do not distinguish between heterozygous and homozygous
	193	βCD 95/βN	βCD 95/βN (or βCD 95/βCD 95)	Concordant	Do not distinguish between heterozygous and homozygous
	194	βCD 95/βN	βCD 95/βN (or βCD 95/βCD 95)	Concordant	Do not distinguish between heterozygous and homozygous
	195	βIVS II-5/βN	βIVS II-5/βN (or βIVS II-5/βIVS II-5)	Concordant	Do not distinguish between heterozygous and homozygous
	196	βIVS II-5/βN	βIVS II-5/βN (or βIVS II-5/βIVS II-5)	Concordant	Do not distinguish between heterozygous and homozygous
	197	βIVS II-5/βN	βIVS II-5/βN (or βIVS II-5/βIVS II-5)	Concordant	Do not distinguish between heterozygous and homozygous
	198	αCD 74α/-α4.2, βCD 17/βN	αCD 74α/-α4.2, βCD 17/βN	Concordant	-
	199	αWSα/--SEA, βCD 37/βN	αWSα/--SEA, βCD 37/βN (or αWSα/--SEA, βCD 37/βCD 37)	Concordant	Do not distinguish between heterozygous and homozygous
	200	β-50/βN	Uninterpreted	Not Concordant	Low DNA concentration (<10 ng/μL)
